# Supplementary material
Source: PubMed Central journal article supplement (PMC11105753)
Supplement: 18_2017_2621_MOESM2_ESM.pdf [file 18_2017_2621_MOESM2_ESM.pdf]

## **Online Resource 2**

**Expression profiling of Tas2r genes reveals a subset of Paneth cells expressing the Tas2r131 in mouse small intestine**

### **Cellular and Molecular Life Sciences**

Simone Prandi, Anja Voigt, Wolfgang Meyerhof, Maik Behrens\*

German Institute for Human Nutrition Potsdam-Rehbruecke, Department of Molecular Genetics, Nuthetal, Germany

\* behrens@dife.de, Tel. +49 33200 88 2545, Fax +49 33200 88 2384

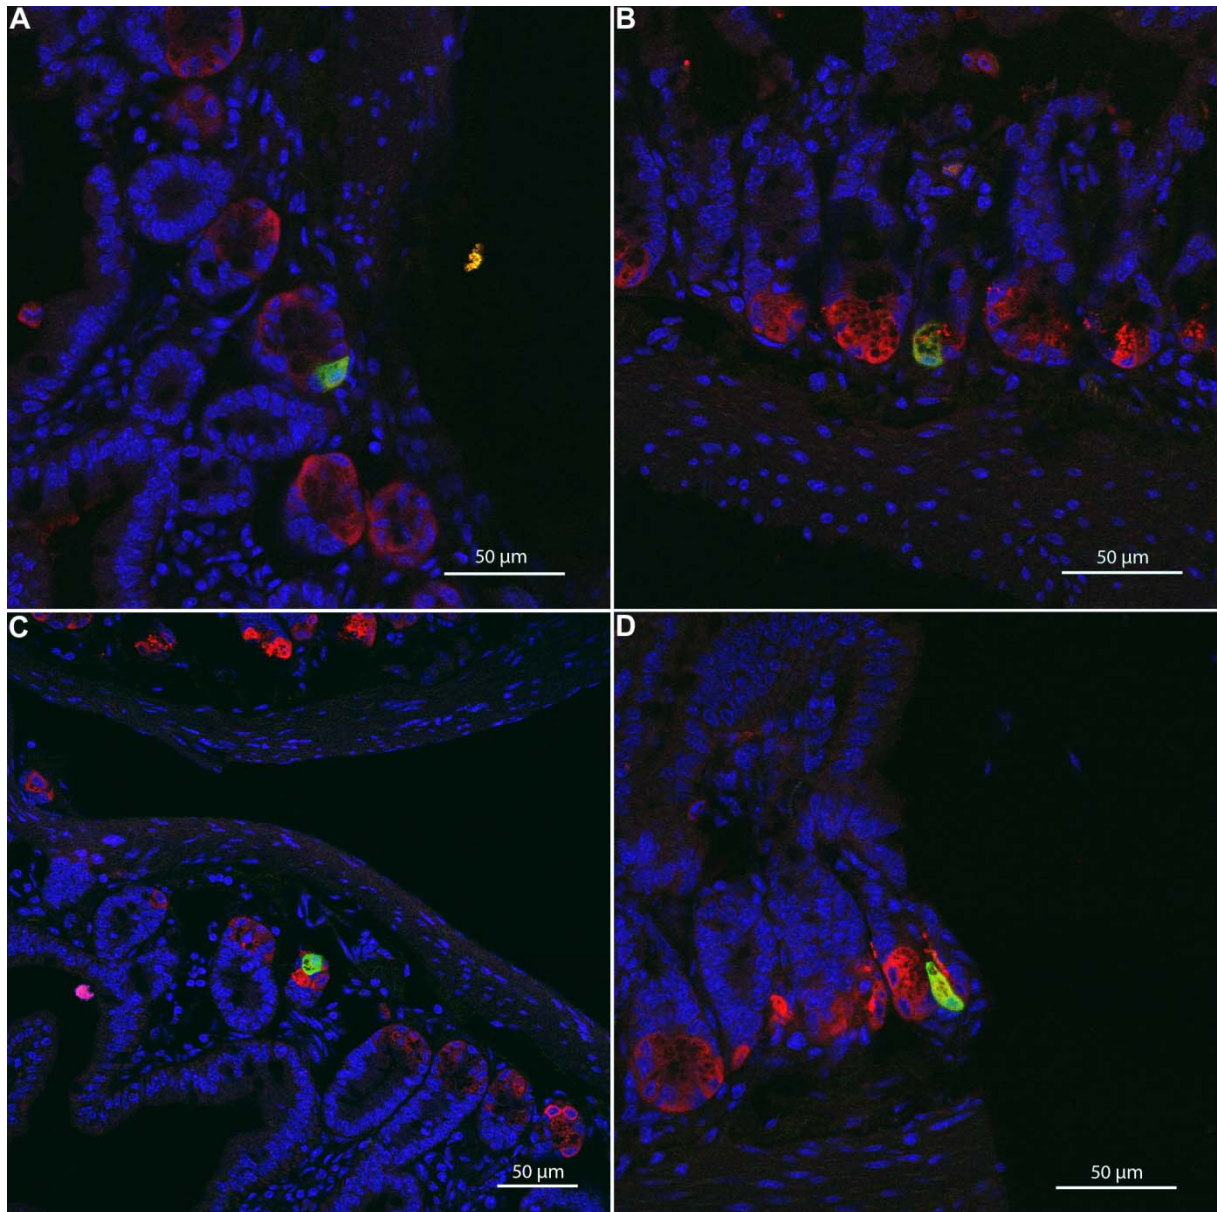

**Online resource 2.** Immunohistochemical identification of the  $Tas2r131^+$  Paneth cells with lysozyme-specific antiserum in the ileum of  $Tas2r131^{+/Blc}/Rosa26^{+/tGFP}$  animals. Cryostat sections of 14  $\mu\text{m}$  thickness were stained for lysozyme and then subjected to confocal laser scanning microscopy (Leica TCS SP2). Note that, in contrast to figure 2 of the main manuscript, the  $Tas2r131^+$  cells in this mouse model (Voigt et al., 2015, Chem Senses) are visualized in green and the anti-lysozyme-labelled cells are labelled in red, DAPI-stained nuclei are depicted in blue.

**Reference:**

Voigt A, Hubner S, Doring L, Perlach N, Hermans-Borgmeyer I, Boehm U, Meyerhof W (2015) Cre-Mediated Recombination in  $Tas2r131$  Cells-A Unique Way to Explore Bitter Taste Receptor Function Inside and Outside of the Taste System. Chem Senses 40:627-639
